# Supplementary material
Source: publisher figshare collection journal article supplement (https://karger.figshare.com/ndownloader/files/28192638)
Supplement: Supplementary file 1 [file 28192638]

| Age | AL | | | CCR | | | | | | WTW | | |
| --- | --- | --- | --- | --- | --- | --- | --- | --- | --- | --- | --- | --- |
| Published normative | MFS eyes | Z-AL | Published normative | | MFS eyes | | Z-CCR | | Published normative | MFS eyes | Z-WTW |
| OD | OS | OD | OS | OD | OS |
| 3 | 22.10±0.79 | 24.28 ± 2.88 | 2.76 ± 3.64 | 7.86 ± 0.26 | 7.86 ± 0.26 | 8.41 ± 0.18 | 8.43 ± 0.18 | 2.11 ± 0.72 | 2.18 ± 0.69 | - | - | - |
| 4 | 22.15±0.72 | 23.88 ± 1.48 | 2.40 ± 2.05 | 7.82 ± 0.28 | 7.83 ± 0.28 | 8.38 ± 0.27 | 8.39 ± 0.26 | 2.03 ± 0.97 | 2.05 ± 0.95 | 12.00 ± 0.38 | 12.24 ± 0.481 | 0.71 ± 1.56 |
| 5 | 22.31±0.68 | 22.73 ± 1.15 | 0.61 ± 1.69 | 7.84 ± 0.26 | 7.85 ± 0.26 | 8.29 ± 0.29 | 8.28 ± 0.28 | 1.69 ± 1.12 | 1.67 ± 1.06 | 12.00 ± 0.38 | 11.94 ± 0.529 | -0.16 ± 1.41 |
| 6 | 22.49±0.75 | 24.35 ± 2.54 | 2.48 ± 3.38 | 7.84 ± 0.26 | 7.84 ± 0.25 | 8.33 ± 0.35 | 8.33 ± 0.36 | 1.91 ± 1.37 | 1.95 ± 1.45 | 12.00 ± 0.38 | 12.23 ± 0.741 | 0.61 ± 1.98 |
| 7 | 22.76±0.79 | 24.42 ± 3.09 | 2.11 ± 3.92 | 7.83 ± 0.27 | 7.84 ± 0.28 | 8.33 ± 0.35 | 8.31 ± 0.37 | 1.85 ± 1.30 | 1.70 ± 1.33 | 12.00 ± 0.38 | 11.62 ± 0.642 | -1.02 ± 1.71 |
| 8 | 23.06±0.88 | 24.04 ± 1.96 | 1.11 ± 2.23 | 7.82 ± 0.26 | 7.82 ± 0.26 | 8.28 ± 0.39 | 8.26 ± 0.42 | 1.80 ± 1.53 | 1.70 ± 1.60 | 12.00 ± 0.38 | 12.29 ± 0.485 | 0.75 ± 1.29 |
| 9 | 23.34±0.89 | 24.73 ± 1.91 | 1.57 ± 2.15 | 7.83 ± 0.26 | 7.84 ± 0.26 | 8.10 ± 0.14 | 8.10 ± 0.16 | 1.04 ± 0.53 | 1.03 ± 0.62 | 12.00 ± 0.38 | 11.57 ± 0.306 | -1.17 ± 0.84 |
| 10 | 23.58±1.01 | 26.20 ± 3.41 | 2.60 ± 3.38 | 7.86 ± 0.26 | 7.87 ± 0.26 | 8.34 ± 0.32 | 8.33 ± 0.40 | 1.84 ± 1.21 | 1.75 ± 1.52 | 12.00 ± 0.38 | 12.23 ± 0.563 | 0.59 ± 1.49 |
| 11 | 23.77±1.03 | 25.24 ± 2.19 | 1.43 ± 2.12 | 7.84 ± 0.26 | 7.84 ± 0.26 | 8.35 ± 0.39 | 8.46 ± 0.27 | 1.96 ± 1.49 | 2.40 ± 1.02 | 12.00 ± 0.38 | 12.36 ± 0.442 | 0.94 ± 1.18 |
| 12 | 23.94±1.08 | 23.75 ± 1.12 | -0.17 ± 1.03 | 7.84 ± 0.26 | 7.85 ± 0.26 | 8.13 ± 0.13 | 8.14 ± 0.11 | 1.15 ± 0.51 | 1.14 ± 0.42 | 12.00 ± 0.38 | 11.58 ± 0.460 | -1.13 ± 1.22 |
| 13 | 24.10±1.17 | 26.14 ± 2.14 | 1.74 ± 1.83 | 7.85 ± 0.28 | 7.86 ± 0.28 | 8.46 ± 0.19 | 8.50 ± 0.25 | 2.15 ± 0.69 | 2.35 ± 0.90 | 12.00 ± 0.38 | 12.00 ± 0.200 | -0.02 ± 0.54 |
| 14 | 24.41±1.30 | 26.08 ± 3.86 | 1.28 ± 2.97 | 7.85 ± 0.29 | 7.86 ± 0.29 | 8.16 ± 0.26 | 8.14 ± 0.29 | 1.07 ± 0.89 | 1.01 ± 1.02 | 12.00 ± 0.38 | 11.70 ± 0.183 | -0.82 ± 0.50 |
| 15 | 24.50±1.21 | 26.60 ± 2.24 | 1.74 ± 1.86 | 7.83 ± 0.26 | 7.84 ± 0.25 | 8.18 ± 0.11 | 8,19 ± 0.14 | 1.38 ± 0.44 | 1.39 ± 0.57 | 12.00 ± 0.38 | 12.12 ± 0.325 | 0.30 ± 0.87 |
| 16 | 24.65 ± 1.22 | - | - | 7.82 ± 0.29 | 7.82 ± 0.27 | - | - | - | - | 12.00 ± 0.38 | - | - |
| 17 | 24.58 ± 1.14 | 26.70 ± 2.38 | 1.86 ± 2.09 | 7.78 ± 0.25 | 7.78 ± 0.26 | 8.15 ± 0.43 | 8.18 ± 0.41 | 1.49 ± 1.72 | 1.57 ± 1.60 | 12.00 ± 0.38 | - | - |
| 18 | 24.50 ± 1.03 | 25.67 ± 2.46 | 1.13 ± 2.39 | 7.79 ± 0.26 | 7.80 ± 0.27 | 8.02 ± 0.15 | 7.99 ± 0.18 | 0.85 ± 0.56 | 0.73 ± 0.67 | 12.00 ± 0.38 | 12.13 ± 0.771 | 0.35 ± 2.07 |
| 19 | 24.50 ± 1.03 | 26.54 ± 1.97 | 1.98 ± 1.92 | 7.79 ± 0.26 | 7.80 ± 0.27 | 8.35 ± 0.27 | 8.34 ± 0.28 | 2.10 ± 1.02 | 2.05 ± 1.04 | 12.00 ± 0.38 | 12.67 ± 1,719 | 1.80 ± 3.34 |
| 20 | 24.50 ± 1.03 | 26.01 ± 2.29 | 1.47 ± 2.23 | 7.79 ± 0.26 | 7.80 ± 0.27 | 8.03 ± 0.64 | 8.00 ± 0.73 | 0.90 ± 2.42 | 0.76 ± 2.74 | 12.00 ± 0.38 | 12.05 ± 0.071 | 0.12 ± 0.21 |

**Supplementary Tab. S1. The external age-matched reference data used in the current study.**

AL, axial length. CCR, corneal curvature radius. MFS, Marfan syndrome. WTW, white-to-white horizontal corneal diameter.
